# Supplementary material for: SiO2@AuAg/PDA hybrid nanospheres with photo-thermally enhanced synergistic antibacterial and catalytic activity
Source: Royal Society of Chemistry journal article supplement (doi:10.1039/d3ra07607e), 2024-01-01
Supplement: d3ra07607e1.pdf [file d3ra07607e1.pdf]

## Supporting Information

### **SiO<sub>2</sub>@AuAg/PDA Hybrid Nanosphere with Photo-thermally Enhanced Synergistic Antibacterial and Catalytic Activity**

*Dazheng Ci, <sup>a</sup> Ning Wang, <sup>a,\*</sup> Yunqi Xu, <sup>b</sup> Shanshan Wu, <sup>c</sup> Jing Wang, <sup>a</sup> Haoran Li, <sup>c</sup>  
Shouhu Xuan, <sup>b</sup> Qunling Fang <sup>a,\*</sup>*

*<sup>a</sup> School of Food and Biological Engineering, Hefei University of Technology, Hefei,  
230009, PR China*

*<sup>b</sup> CAS Key Laboratory of Mechanical Behavior and Design of Materials, Department  
of Modern Mechanics, University of Science and Technology of China, Hefei 230027,  
PR China*

*<sup>c</sup> School of Materials and Chemical Engineering, Anhui Jianzhu University, Hefei, PR  
China*

**\*Corresponding author:**

Asso. Prof. **Ning Wang**

E-mail: [nwangcn@hfut.edu.cn](mailto:nwangcn@hfut.edu.cn)

Tel: [15155934837](tel:15155934837)

Asso. Prof. **Qunling Fang**

E-mail: [fql.good@hfut.edu.cn](mailto:fql.good@hfut.edu.cn)

Tel: [86-551-62904353](tel:86-551-62904353)

Fax: [86-551-62904353](tel:86-551-62904353)

**Figure S1**

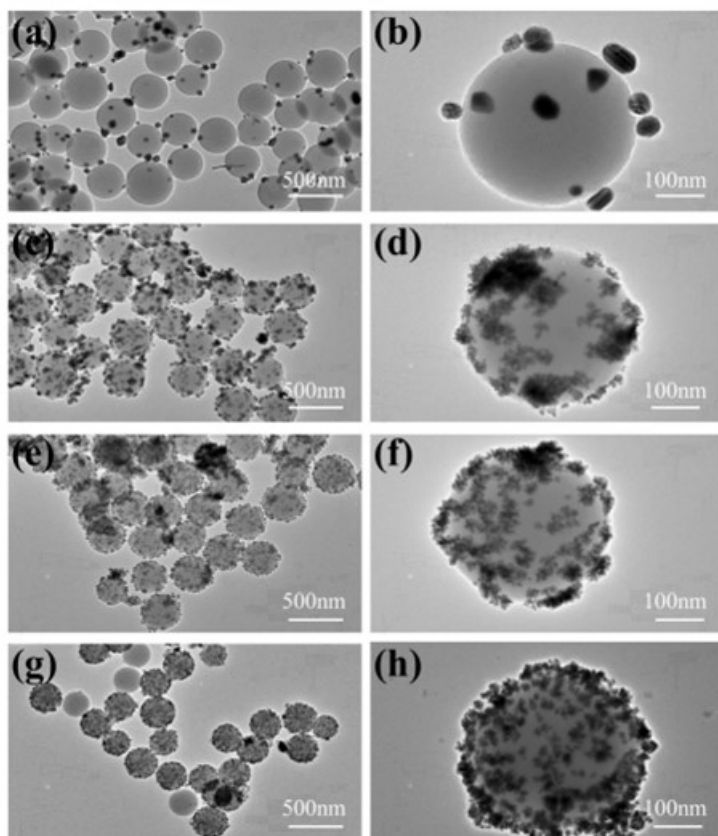

**Figure S1.** TEM images of the SiO<sub>2</sub>@AuAg/PDA prepared with different concentration of chloroauric acid: 0 mM (a, b), 5.94 × 10<sup>-3</sup> mM (c, d), 8.82 × 10<sup>-3</sup> mM (e, f), 1.17 × 10<sup>-2</sup> mM (g, h). The concentration of AgNO<sub>3</sub> was kept at 2.0 × 10<sup>-2</sup> mM as a constant.

**Figure S2**

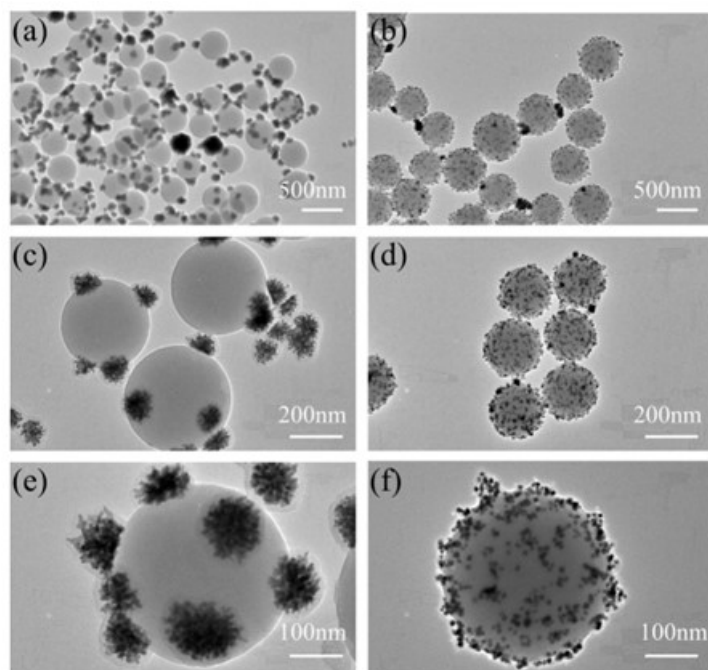

**Figure S2.** TEM images of SiO<sub>2</sub>@Au/PDA without APTES modification (a, c, e) and SiO<sub>2</sub>@Au/PDA with APTES modification with the same Au content (b, d, f).

**Figure S3**

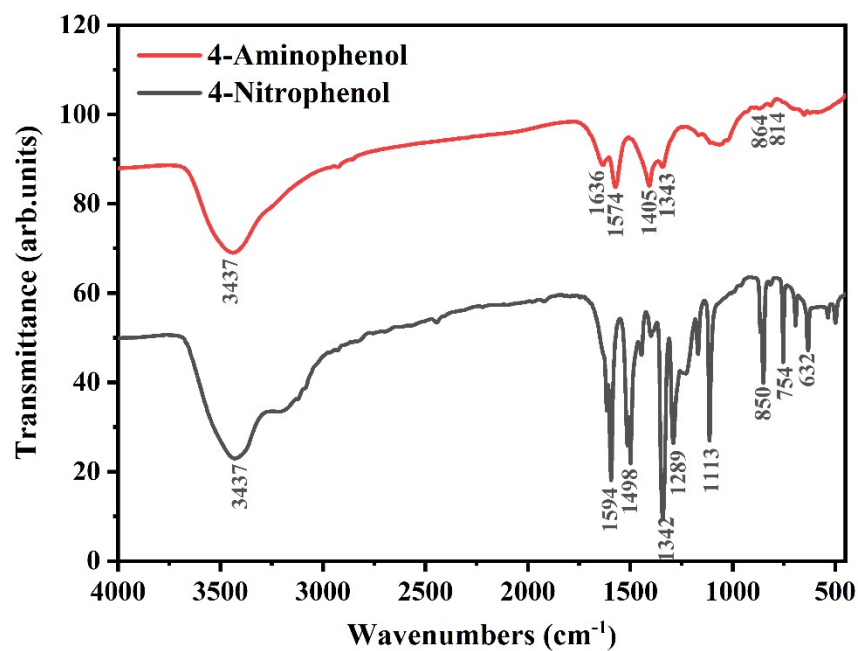

**Figure S3.** Infrared spectra before and after the catalytic 4-nitrophenol reaction.
